# Supplementary material
Source: MDPI journal article supplement (https://www.mdpi.com/2072-4292/13/9/1665)
Supplement: s1 [file s1]

# Supplementary Materials: Ground Deformation Modelling of 2020 Mw6.9 Samos Earthquake (Greece) Based on InSAR and GNSS Data

Vassilis Sakkas <sup>1</sup>

<sup>1</sup> Department of Geophysics-Geothermics, National Kapodistrian University of Athens, Greece.

\* Correspondence: vsakkas@geol.uoa.gr; Tel.: +30 2107274914

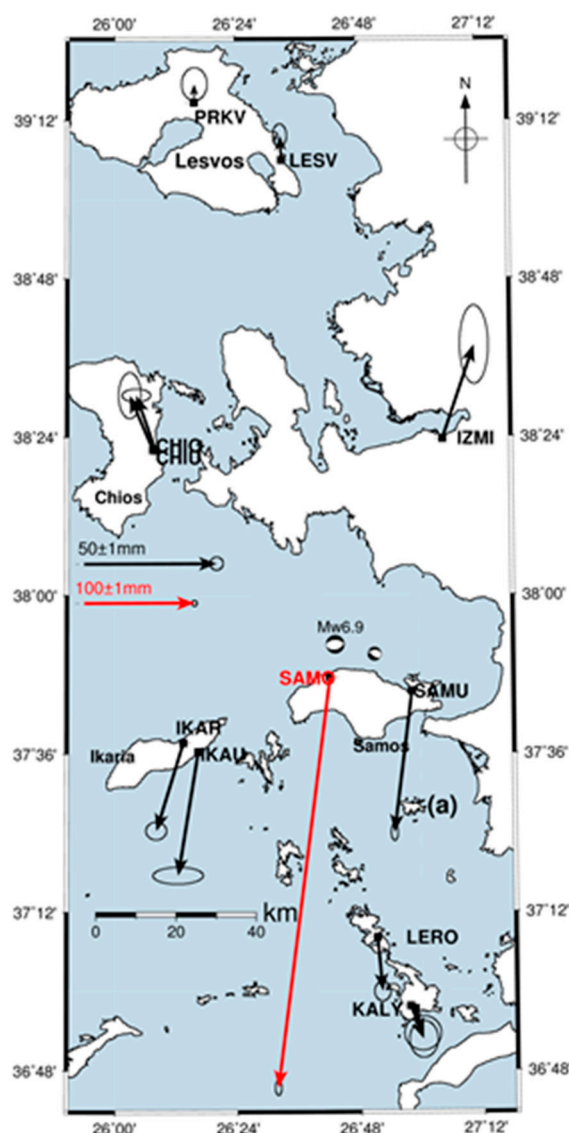

**Figure S1.** Horizontal GNSS co-seismic vectors for the broader area of Samos Island, revealing the co-seismic displacement that occurred also to the islands of Lesvos (stations LESV and PRKV), Leros (site LERO) and Kalymnos (two stations KALY and KALU).

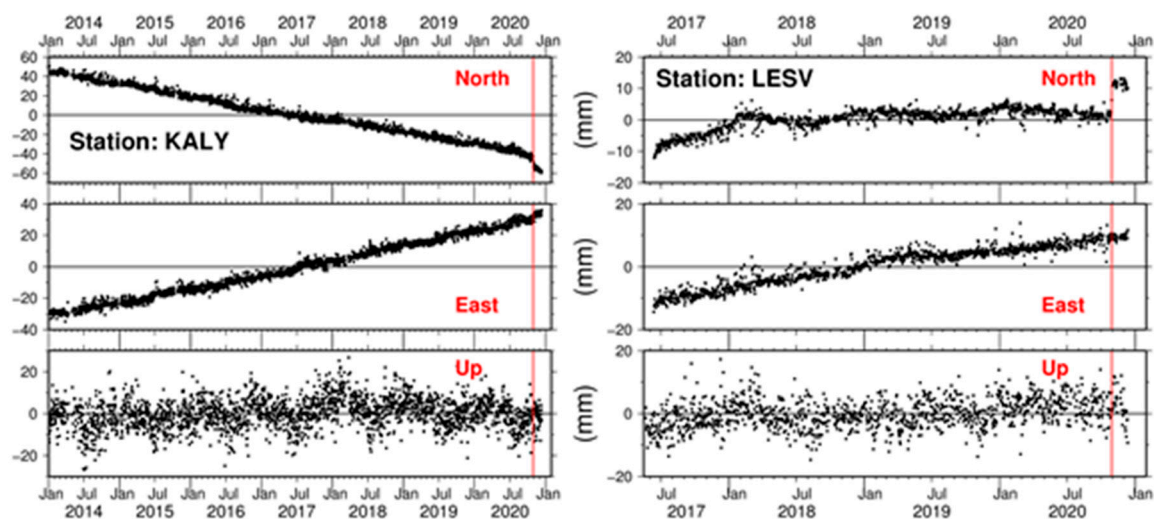

**Figure S2.** Time series for the two GNSS stations located to Kalymnos Island (KALY) south of Samos, and to Lesvos Island (LESV) north of Samos. Red line defines the day of the event. Reference frame: ITRF2014.

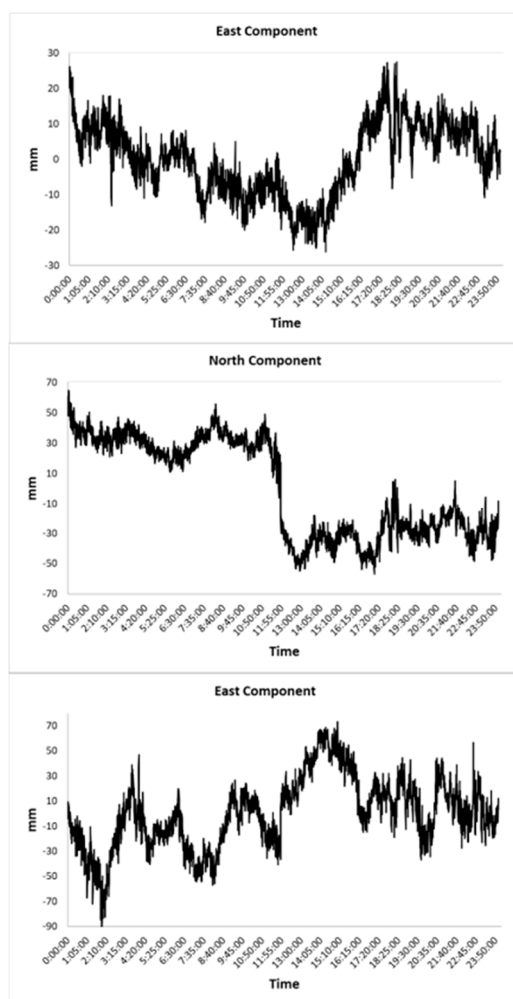

**Figure S3.** Time series on the GNSS station SAMU on 30sec time interval processing, for the day of the earthquake (October 30, 2020). The earthquake occurred at 11:51 UTC.
